# Supplementary material
Source: PubMed Central journal article supplement (PMC1838972)
Supplement: mbc_E06-10-0960_1.pdf [file mbc_E06-10-0960_1.pdf]

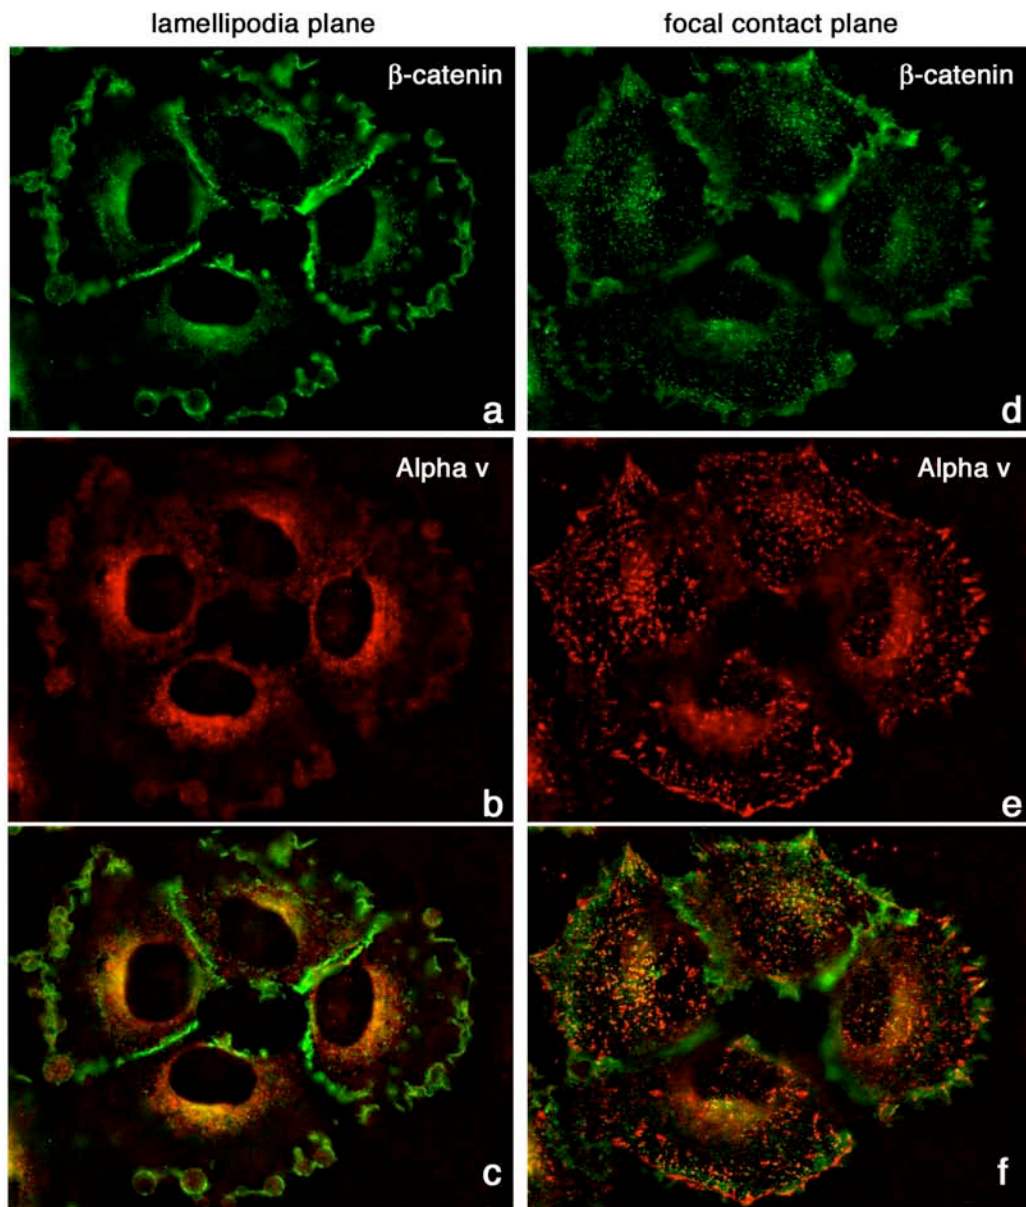

Supplemental figure 1.

Immunofluorescence of HT1080 cells stained with  $\beta$ -catenin and  $\alpha v$  integrin. The images were digitally deconvolved as described in Materials and Methods. Panel a shows the localization of  $\beta$ -catenin in the lamellipodial plane of focus.  $\beta$ -catenin localized strongly to free cell borders and to cell-cell borders. Panel b shows that  $\alpha v$  integrin was not in lamellipodia. Panel c is a merged image. Panels d and e show  $\beta$ -catenin and  $\alpha v$  integrin staining, respectively, in the focal contact plane of focus. Panel f is a merged image showing strong  $\alpha v$  integrin staining in focal contacts while  $\beta$ -catenin staining was mainly visible at cell-cell borders.
