# Supplementary material
Source: PubMed Central journal article supplement (PMC1838972)
Supplement: mbc_E06-10-0960_2.pdf [file mbc_E06-10-0960_2.pdf]

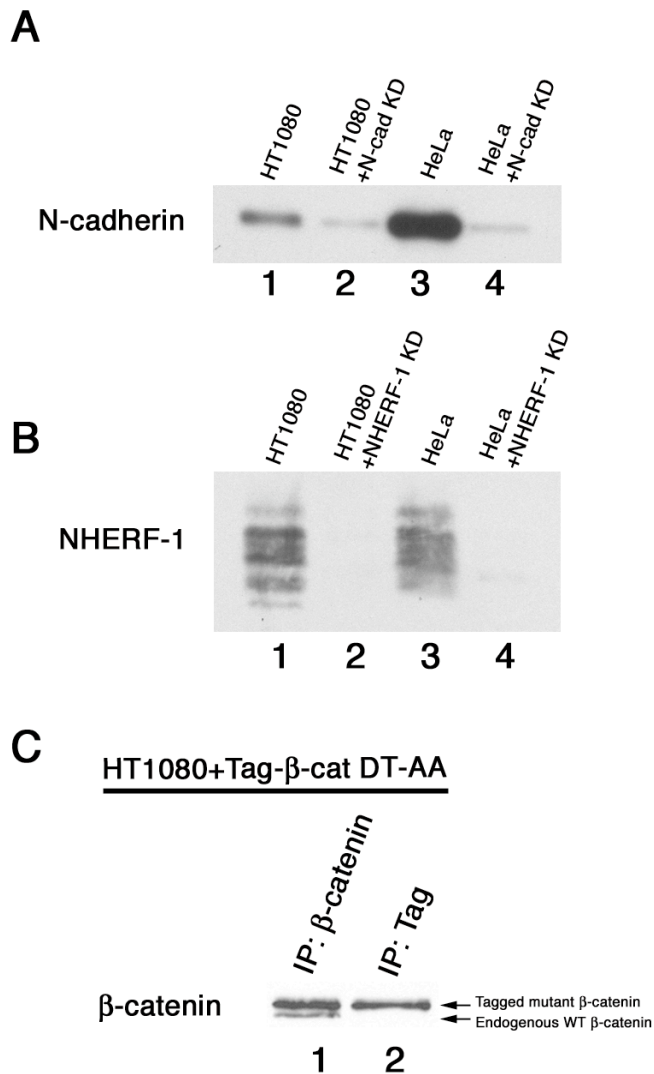

Supplemental figure 2

A) Extracts of parental HT1080 cells (lane 1), HT1080 cells expressing shRNA against N-cadherin (lane 2), parental HeLa cells (lane 3) and HeLa cells expressing shRNA against N-cadherin (lane 4) were resolved by SDS-PAGE and immunoblotted for N-cadherin. B) Extracts of parental HT1080 cells (lane 1), HT1080 cells expressing shRNA against NHERF-1 (lane 2), parental HeLa cells (lane 3) and HeLa cells expressing shRNA against NHERF-1 (lane 4) were resolved by SDS-PAGE and immunoblotted for NHERF-1. C) Equal amounts of extract from HT1080 cells expressing mutant  $\beta$ -catenin that cannot bind to NHERF ( $\beta$ -catenin DT-AA) were immunoprecipitated with anti- $\beta$ -catenin (lane 1) or with anti-birch profilin tag. The immunoprecipitation reactions were resolved by SDS-PAGE and immunoblotted for  $\beta$ -catenin.
